# Supplementary material for: High levels of IGF-1 predict difficult intubation of patients with acromegaly
Source: Endocrine. 2017 Jun 15;57(2):326–34. doi: 10.1007/s12020-017-1338-x (PMC5511320; doi:10.1007/s12020-017-1338-x)
Supplement: Supplementary file 1 — Supplementary Information [file 12020_2017_1338_MOESM1_ESM.xlsx]

## Sheet: Additional data
NAME	DI(1=Y,0=N)	SEX(1=M,0=F)	AGE	HEIGHT/cm	WEIGHT/kg	BMI	DD/month	HT(1=Y,0=N)	DM(1=Y,0=N)	LDT/cm	Glu,mmol/L	GH,ng/ml	GH NADIR,ng/ml	IGF-1,ng/ml	GH BURDEN	IGF-1 BURDEN	AHI	MOUTH OPENING/cm	MANDIBLE LENGTH/cm	THYROID-CHIN DISTANCE/cm	NECK EXTENSION/degree	NECK CERCUMFERENCE/cm	TIME OF INTUBATION/s	OSAHS(1=Y,0=N)	MASK VENTILATION DIFFICULTY	EXTERNAL LARYNGEAL PRESSURE (1=Y,0=N)	INTUBATION ATTEMPTS
YU Z	0	1	42	175	80	26.1224	60	0	0	12.5	4.5	23.7	16.6	673	1422	40380	7.6	4	11	8	30	42	56	1	1	0	1
LEI G	0	1	41	178	87	27.4587	120	0	0	31	5.9	31.4	25	1031	3768	123720	4	5	10.5	9	30	39	33	0	1	0	1
LIU Y	0	1	48	170	64	22.1453	240	0	1	14.1	7.7	9.24	6.14	601	2217.6	144240	0.2	5	13	10	35	36.5	35	0	2	0	1
HAN Z	0	0	33	158	65	26.0375	48	0	0	20	4.9	18	6.59	614	864	29472	0.8	4.5	11	8	30	42	35	0	1	0	1
LIU C	0	0	44	165	65	23.8751	36	0	0	15	5.8	14.3	8.58	768	514.8	27648	1.2	4	12	9	40	38	25	0	1	0	1
QIAO J	0	1	29	165	75	27.5482	36	0	1	17.6	8.3	23	18	1063	828	38268	1	3	12	8	30	41	20	0	2	1	1
SHI M	1	1	46	174	102	33.6901	84	1	1	21.9	8.8	17.3	11.2	1140	1453.2	95760	53.6	3.5	13	10	25	46	20	1	2	1	1
KANG X	1	0	50	161	60	23.1473	120	0	0	15	5.6	10.9	10.9	764	1308	91680	15.2	3.5	11	8.5	30	38	85	1	3	1	2
WANG S	1	0	35	163	59	22.2063	60	0	0	42	4.8	32.1	19.4	1214	1926	72840	1.7	4.5	14	10	45	35	28	0	1	0	1
ZHAO J	1	1	36	170	70	24.2215	120	0	1	25.4	7.7	67	18.4	1153	8040	138360	6.7	3.5	11.5	7.8	45	40	45	1	2	1	1
GUAN T	1	1	37	167	70	25.0995	12	0	1	6	5.6	3.6	3.35	1080	43.2	12960	53.5	5	14	10	40	42	35	1	2	1	1
GAO X	1	0	37	165	60	22.0386	48	0	0	15.2	5	21.9	12.7	1167	1051.2	56016	2	4	14	12	30	39	25	0	2	1	1
WANG S	1	1	36	173	100	33.4124	96	1	0	10.5	5.3	9	8.26	1600	864	153600	1.2	6	11	13	40	48	38	0	3	0	1
SHI Z	1	0	40	166	72	26.1286	36	0	0	12.9	5.4	21.7	20.4	768	781.2	27648	1.5	5	13	8	45	38.5	26	0	1	0	1
ZHANG Y	1	1	53	175	80	26.1224	24	1	1	15	8.5	20.4	13.5	1339	489.6	32136	47.3	5	10.5	9	35	40	22	1	3	1	1
LIU J	1	1	53	175	93.5	30.5306	204	1	0	9.8	6	4.3	0.77	929	877.2	189516	39	4	12	9.5	30	41.5	130	1	1	1	2
min			29	158	59	22.0386	12			6	4.5	3.6	0.77	601	43.2	12960	0.2	3	10.5	7.8	25	35	20
max			53	178	102	33.6901	240			42	8.8	67	25	1600	8040	189516	53.6	6	14	13	45	48	130
ave			41.25	168.75	75.1562	26.2365	84			17.7437	6.2375	20.49	12.4869	994	1653	79640.2	14.7812	4.34375	12.0938	9.3625	35	40.4062	41.125
sd			7.20648	5.84808	14.0851	3.65016	64.3988			8.91396	1.44632	15.0326	6.75013	281.174	1910.72	55374.6	20.5931	0.78991	1.25457	1.47958	6.58281	3.28744	28.784
